# Supplementary material for: Clinical and molecular characterization of a novel pathogenic AIFM1 E336K mutation connecting mitochondrial dysfunction and neurodegeneration
Source: Research Square preprint supplement (doi:10.21203/rs.3.rs-8316196/v1), 2026-02-18
Supplement: Supplementary file 1 [file 0ba18dad813c73d12d07a618.docx]

**Supporting Information**

**Clinical and molecular characterization of a novel pathogenic AIFM1 E336K mutation connecting mitochondrial dysfunction and neurodegeneration**

Miguel Ferrer1,2#†, María Pedrón1†, Olga Soriano1,2, Marta Martínez-Julvez1,2, Mikel Marín-Baquero1, Rut García-Villanueva1,2, Adrián Velázquez-Campoy1,2,3,4, Joaquín Marco-Brualla1,5, Cristina Ripollés-Yuba1, Patricio Fernández-Silva1,2, Milagros Medina1,2, María Dolores Miramar6, María Bestué7 Raquel Moreno-Loshuertos1,2* and Patricia Ferreira1,2*

**Table of Contents**

**Supplementary Figures**

**Figure S1** Effect of E336K mutation on ROS metabolism and cell growth

**Figure S2** Spectroscopic properties of purified WT and E336K proteins

**Figure S3** Impact of E336K mutation in AIF redox properties

**Figure S4** Isothermal calorimetric titrations of WTΔ101 and E336K Δ101 variants with CHCHD4, CypA and dsDNA

**Supplementary tables**

**Table S1** Continuation of Table 1: Summary of previously reported pathogenic AIFM1 variants

**Table S2** Thermal stability of AIF∆101 variants in oxidized and reduced states

**Table S3** Thermodynamic parameters for the interaction of AIF∆101 variants with CHCHD4, CypA and dsDNA

**Table S4** Primer sequences used along this work

**Table S5** Data collection and structural refinement statistics of the E336K∆101 variant

**Figure S1.** Effect of E336K mutation on ROS metabolism and cell growth**.** (**A**)Relative expression levels of mitochondrial superoxide dismutase mRNA in WT and E336K cells. (**B**)MNNG induced growth inhibition in WT and E336K cells analysed using the MTT reduction method. Data are expressed as mean ± SD of the mean (n≥3 in all cases). Asterisks indicate p>0.05

**Figure S2.** Spectroscopic properties of purified WT and E336K proteins. (**A**)Visible absorption spectra of purified oxidized WTΔ77, WTΔ101, E336KΔ77 and E336KΔ101. The spectra were recorded at different concentrationsin 50 mM potassium phosphate buffer, pH 7.4, at 25 ºC to simplify the visualization. (**B**)CD spectra in the near–UV/Vis (upper panels) and the far–UV (lower panels), recorded in the absence (left) and presence (right) of a 100–fold molar excess of NADH. Fluorescence emission spectra of WTΔ101 and E336KΔ101 in the aromatic (**C**) and flavin (**D**) region at 25 ºC with excitation wavelengths at 280 nm and 450nm, respectively. Assays were carried out in the absence (solid lines) or presence (dashed lines) of a 100-fold molar excess of NADH. Spectra were recorded in 50 mM potassium phosphate buffer, pH 7.4, at 25 ºC, with a final ionic strength of 150 mM. Thermal stability of WTΔ101 (dark blue symbols) and E336KΔ101 (light blue symbols) in the absence (**E**) or presence of NADH (**F**). Thermal protein unfolding was monitored by far-UV CD (open colored squares), near-UV CD (300 nm, colored cross) or flavin fluorescence emission (inverted open colored triangles). For both AIFΔ101ox and AIFΔ101rd states, far-UV CD measures were recorded at 210 nm, and flavin fluorescence upon release was monitored by excitation at 450 nm and emission at 530 nm. For near-UV CD measures, the protein denaturation was monitored at 300 nm and 410 nm for AIFΔ101ox and AIFΔ101rd, respectively. Data were normalized from 0 to 1, and globally fitted to a two-transitions (dashed lines) or a one-transition (solid lines) unfolding model. Reduced states were obtained by incubation the oxidized proteins with a 100-fold molar excess of NADH. In all panels, samples for WTΔ101, E336KΔ101, WTΔ77 and E336KΔ77 are shown in dark blue, light blue, dark red and black, respectively.

**Figure S3.** Impact of E336K mutation in AIF redox properties. NADH (**A**) or NADPH (**B**) concentration dependence of the initial velocity of the diaphorase activity for WTΔ101 (blue circles) and E336KΔ101 (light blue circles). Solid lines represent fits of the experimental data to Equation 3 for WTΔ101 and E336KΔ101. (**C**)NADH concentration dependence of the observed rate constants for flavin reduction of WTΔ101 (blue circles), and E336KΔ101 (light blue circles) as determined by pre-steady state kinetics of the FAD half-reductive reaction. Solid lines represent fits to Equation 5 for WTΔ101 and E336KΔ101 variants. In all panels, samples for WTΔ101, and E336KΔ101 are shown in blue and light blue, respectively.

**Figure S4.** Isothermal calorimetric titrations of WTΔ101 and E336K Δ101 variants with CHCHD4, CypA and dsDNA.Calorimetrictitrations of (**A-B**) WTΔ101rd:NADH and E336KΔ101rd:NADH with CHCHD4, and of WTΔ101ox and E336KΔ101ox with (**C-D**) CypA and (**E-F**)dsDNA. Upper panels show the raw thermograms for each interaction, while lower panels display the corresponding binding isotherms with integrated heats. Data were fitted using a custom model assuming a single binding site. For AIFΔ101rd:CHCHD4 interactions, the reduced forms of AIFΔ101 were obtained by preincubating the oxidized proteins with a 100-fold molar excess of NADH. In all panels, samples for WTΔ101, and E336KΔ101 are shown in blue and light blue, respectively.

| Table S1. Continuation of Table 1: Summary of previously reported pathogenic AIFM1 variants | | | | | | | | | | |
| --- | --- | --- | --- | --- | --- | --- | --- | --- | --- | --- |
| Mutation | **Disease onset** | **Progression** | | **Phenotypes** | **Domain** | **Protein level** | **OXPHOS activity** | **Redox activity** | **Cell death** | **Ref.** |
| COXPD6 | | | | | | | | | | |
| P169L | Prenatal | Rapid, 1-39d died | Severe multisystem mitochondrial disease with lactic acidosis, hypotonia, cerebral malformations, cardiomyopathy, hepatopathy | | FAD-binding | Reduced ~70% and less stability | Complex I and IV deficiency; mitochondrial stress | --- | Enhanced | [13] |
| ∆R201 | Early age | Rapid; severe clinical conditions | Severe mitochondrial encephalomyopathy with psychomotor regression, seizures, hypotonia, axonal neuropathy, ragged-red fibers, and OXPHOS deficiency | | FAD-binding | Normal but more susceptible to proteolytic degradation and FAD loss | Complex III and IV deficiency, mtDNA depletion in skeletal muscle | Increased NADH oxidation, destabilized CTC, lower selectivity NADH versus NADPH | Enhanced; higher DNA affinity | [6] |
| V243L | 2.5y | Slow | Muscular atrophy, cerebellar ataxia, and sensorineural hearing loss. | | FAD-binding | Reduced | Reduced activity Complex I (~40%); Complex I, III and CIV deficiency; no severe global OXPHOS dysfunction | Not altered | Not altered | [8, 21] |
| G308E | Before 1y | Rapid; died 15 m, others alive | Mitochondrial encephalomyopathy with psychomotor regression, axonal neuropathy, seizures, hypotonia, and OXPHOS defects. | | NADH-binding | Normal level but reduced stability | Reduced activity Complex I and IV | Reduced NADH affinity, destabilized CTC | Not altered | [2, 21, 22] |
| G338E | Neonatal | Rapid | Mitochondrial encephalopathy with COX deficiency, SMA-like neurogenic muscle atrophy, axonal motor neuropathy, frontotemporal atrophy, and ventriculomegaly. | | NADH-binding | Reduced ~80% and less stability | Complex IV deficiency | Decreased NADH oxidation, | Not altered | [3, 21] |
| Q479R | Neonatal | Rapid, 4m died | Fatal mitochondrial encephalomyopathy with lactic acidosis, intractable seizures, axonal neuropathy, severe cortical and cerebellar atrophy, and liver steatosis. | | FAD-binding | Predicted destabilization | Reduced activity Complex I and CIV | --- | --- | [12] |
| DFNX5 | | | | | | | | | | |
| T260A | Childhood | Slow | ANSD with unsteadiness, extremity numbness; no cognitive or muscle involvement | | FAD-binding | Predicted destabilization | --- | --- | --- | [20, 25] |
| L333F | 13y | Slow | Bilateral auditory neuropathy; mild upsloping hearing loss; stable MRI findings | | NADH-binding | Predicted destabilization | --- | --- | --- | [23] |
| L344F | Childhood | Slow | ANSD with mild numbness in limbs; brain MRI normal except cochlear nerve hypoplasia | | NADH-binding | Predicted destabilization | --- | --- | --- | [23, 24] |
| S349G | 16y, 30y | Slow | Isolated auditory neuropathy (a type of sensorineural hearing loss with preserved outer hair cell function and impaired auditory nerve function) | | NADH-binding | Predicted destabilization | --- | --- | --- | [5] |
| G360R | Childhood | Slow | Mild hearing loss, ANSD, unsteadiness, and sensory neuropathy. | | NADH-binding | --- | --- | --- | --- | [24] |
| R422W | Childhood | Slow | ANSD with cochlear nerve hypoplasia and peripheral sensory neuropathy | | FAD-binding | Predicted destabilization | --- | Reduced NADH affinity, destabilized CTC and impaired dimerization | Enhanced | [20, 24] |
| R422Q | Childhood | Slow | ANSD with peripheral sensory neuropathy (numbness, unsteadiness); CNH documented by MRI | | FAD-binding | Predicted destabilization | --- | --- | --- | [9, 18, 19, 24] |
| R430C | NA | NA | ANSD with moderate bilateral hearing loss, peripheral sensory neuropathy, visual impairment | | FAD-binding | --- | --- | --- | --- | [24] |
| R451Q | Childhood | Slow | ANSD with extremity numbness, areflexia, and unsteadiness; no cognitive impairment | | FAD-binding | Normal but predicted destabilization | --- | Reduced NADH affinity, destabilized CTC and impaired dimerization | Enhanced | [20, 24] |
| A465V | 21y | Slow | Bilateral auditory neuropathy; mild-to-moderate up sloping hearing loss | | FAD-binding | Predicted destabilization | --- | --- | --- | [23] |
| A472V | NA | NA | ANSD with mild hearing loss, peripheral neuropathy | | FAD-binding | --- | --- | --- | --- | [24] |
| P475L | NA | NA | ANSD with mild hearing loss, auditory and peripheral | | FAD-binding | --- | --- | --- | --- | [24] |
| T492H | Neonatal | Rapid, died neonates | Mitochondrial encephalomyopathy; associated with combined OXPHOS defect, muscle biopsy showing SMA-like pattern (spinal muscular atrophy-like) | | C-terminal | --- | Combined OXPHOS defect | --- | --- | [17] |
| V498M | 6y, 20y | Slow | Auditory neuropathy with tinnitus, numbness in extremities, visual impairment (e.g., myopia), and gait instability | | C-terminal | --- | Increased ROS production, mitochondrial dysfunction | --- | --- | [1, 23, 24] |
| Y560H | 11y, 20y | Slow | Bilateral auditory neuropathy; mild to moderate hearing loss; one case with MRI showing cochlear nerve hypoplasia | | C-terminal | Predicted destabilization | --- | --- | --- | [23] |
| I591M | Childhood | Slow | ANSD with mild hearing loss, possible tinnitus and signs of peripheral sensory neuropathy | | C-terminal | Predicted destabilization | --- | --- | --- | [24] |
| SEMDHL | | | | | | | | | | |
| Q235H | 12-36m | Slow | Hypomyelinating leukodystrophy with spasticity, ataxia, dysarthria, mild cognitive impairment, and spondylometaphyseal dysplasia with brachydactyly, joint contractures, and scoliosis | | FAD-binding | Reduced | --- | --- | --- | [11] |
| D237G | 12-36m | Slow | Hypomyelinating leukodystrophy with spondylometaphyseal dysplasia (H-SMD). Features include motor deterioration, spasticity, tremor, ataxia, dysarthria, mild cognitive impairment, vision loss (e.g. macular degeneration), joint contractures, scoliosis, and short stature | | FAD-binding | Reduced at protein and mRNA levels | --- | --- | --- | [10] |
| D237V | 12-36m | Slow, died adulthood | Hypomyelinating leukodystrophy with spasticity, ataxia, dysarthria, mild cognitive impairment, and spondylometaphyseal dysplasia with brachydactyly, motor deterioration, vision loss, pulmonary hypertension (in some cases), and skeletal dysplasia | | FAD-binding | Reduced at protein and mRNA levels | ---- | ---- | --- | [11] |
| c.697-27T>Ga | 3-6m | Slow | Cerebral hypomyelination with progressive ataxia, spasticity, dysarthria, nystagmus, Severe spondylometaphyseal dysplasia (short stature, joint contractures, kyphoscoliosis), visual impairment and respiratory complications. | | Exon 7 skipping | Reduced | --- | --- | --- | [4] |
| C720C>T (D240D)b | 12-36m | Slow | Cerebral hypomyelination with progressive ataxia, spasticity, dysarthria, nystagmus, Severe spondylometaphyseal dysplasia (short stature, joint contractures, kyphoscoliosis), visual impairment and respiratory complications. | | Exon 7 skipping | Reduced mRNA and protein | --- | --- | --- | [4, 11] |
| IVS6AS, T-G, -44 | 12-36m | Slow; died childhood,26y 37y, others alive | Hypomyelinating leukodystrophy with spasticity, ataxia, dysarthria, mild cognitive impairment, and spondylometaphyseal dysplasia with brachydactyly | | FAD-binding | Reduced including mRNA level | --- | --- | --- | [11, 14] |
| Not identified | | | | | | | | | | |
| S57P | Neonatal | Rapid, died 6m | Neonatal mitochondrial encephalopathy with profound hypotonia, seizures, respiratory failure, lactic acidosis, microcephaly and brain atrophy with abnormal myelination on MRI. | | N-terminal, near the mitochondrial targeting sequence | Undetectable, absence of mature protein | Decreased activity Complex I and IV, mitochondrial dysfunction | --- | Increased susceptibility inferred from absence of AIF | [16] |
| c.1164 + 5G > Ac | 2d | Rapid; died 4m | Severe neonatal mitochondrial encephalomyopathy: hypotonia, muscle weakness, intractable lactic acidosis, respiratory failure, and diffuse brain lesions including ventriculomegaly and basal ganglia hyperintensities. MRI and MRS showed mitochondrial disease markers. | | Exon 7 skipping | Severely reduced and less stability | Decreased NAD⁺/NADH ratio in patient fibroblasts; Complex IV levels normal | --- | --- | [15] |
| E453Q | Adolescence | Slow | Ataxic sensory neuronopathy with pseudoathetosis, dysesthesia, muscle wasting in lower limbs, pes cavovarus, and hearing impairment. Cognitive function was normal. No encephalopathy or brain MRI abnormalities | | FAD-binding | --- | Lactate/pyruvate ratio was significantly elevated during aerobic exercise, indicating defective oxidative phosphorylation | --- | --- | [7] |
| a Intronic 6 mutation, leads to exon 7 skipping; bSynonymous variant in exon 7, disrupts splicing (exon 7 skipping); c Intronic mutation near the 5′ splice site of intron 11, affecting splicing between exons 11 and 12 that leads to exon 11 skipping. NA: not available; d: days; m: months; y, year; ---: not studied; ANSD: X-linked Auditory Neuropathy Spectrum Disorder; mtDNA: mitochondrial DNA; | | | | | | | | | | |

| **Table S2.** Thermal stability of AIF∆101 variants in oxidized and reduced states | | | | | | | | | | | |
| --- | --- | --- | --- | --- | --- | --- | --- | --- | --- | --- | --- |
| **Variants** | **AIFΔ101ox** | | | | |  | **AIFΔ101rd:**NAD+ | | |  | |
| ***T*m1**  **(K)** | ***T*m2**  **(K)** | **ΔH1**  **(kcal/mol)** | | **ΔH2**  **(kcal/mol)** |  | ***T*m1**  **(K)** | ***T*m2**  **(K)** | **ΔH1**  **(kcal/mol)** | | **ΔH2**  **(kcal/mol)** | |
| **WT∆101a** | 334 ± 2 | 336 ± 2 | 46 ± 3 | 110 ± 10 | |  | 327 ± 1 | - | 180 ± 10 | | - | |
| **E336K∆101** | 328 ± 1 | 331 ± 1 | 123 ± 10 | 190 ± 15 | |  | 327 ± 1 | 329 ± 1 | 128 ± 10 | | 210 ± 15 | |
| Values obtained by global fitting of near-UV/Vis CD, far-UV CD and fluorescence thermal denaturation curves to a two-state or three-state unfolding model (data from Figure S2-E-F). Data obtained in 50 mM potassium phosphate, pH 7.4, at a final ionic strength of 150 mM, from 283.15 to 363.15 K. Protein concentration was ~20, ~5 and ~2 µM for each technique respectively, and NADH concentration was in 100-fold excess. (n=3, mean ±SD). aData from Villanueva et al. 2019. | | | | | | | | | | | |

| **Table S3.** Thermodynamic parameters for the interaction of AIF∆101 variants with CHCHD4, CypA and dsDNA | | | | | | |
| --- | --- | --- | --- | --- | --- | --- |
| **Variants** | **Titrating ligand** | ***K*d**  **(µM)** | **N** | **Δ*H***  **(kcal/mol)** | **Δ*G***  **(kcal/mol)** | **-TΔ*S***  **(kcal/mol)** |
| **WTΔ101ox** | CHCHD4 | Not detected binding | | | | |
| **WTΔ101rd** | CHCHD4 | 0.3 | 1 | -10.0 | -8.9 | 1.1 |
| **E336KΔ101ox** | CHCHD4 | Not detected binding | | | | |
| **E336KΔ101rd** | CHCHD4 | 1.6 | 0.9 | -2.7 | -7.9 | -5.2 |
| **WTΔ101ox** | dsDNA | 3.7 | 0.8 | 5.1 | -7.2 | -12.3 |
| **E336KΔ101ox** | dsDNA | 2.6 | 0.5 | 6.3 | -7.4 | -13.7 |
| **WTΔ101ox** | CypA | 0.4 | 1 | -10.2 | -8.2 | 2 |
| **E336KΔ101ox** | CypA | 0.9 | 1.5 | -6 | -8.3 | -2.3 |
| Values obtained from ITC assays at 25, 15 and 10 ºC for titrations with CypA and dsDNA CHCHD4, respectively, in 50 mM potassium phosphate, pH 7.4. N is the calculated biding stoichiometry. The thermodynamic parameters were calculated by *K*d = (*K*a)−1, Δ*G* = RT.ln*K*d and –T.Δ*S* = Δ*G* - Δ*H*. Errors considered in the measured parameters (± 20% in *K*d and ± 0.3 kcal/mol in Δ*H* and -TΔ*S*) were taken larger than the standard deviation between replicates and the numerical error after the fitting analysis. | | | | | | |

| **Table S4.** Primer sequences used along this work | | | |
| --- | --- | --- | --- |
| **Gene** | **Primer name** | ***Position*** | **Sequence** |
| **AIFM1**  **(NM_004208.4)** | AIF RTF | 77-96 | GAAGCCCGAGGCAGAGGAAC |
| AIF RTR | 142-161 | TGATGCACCAGAGCTAGCCA |
| **SOD2**  **(NM_000636.4)** | hSOD2 RTF | 572-591 | TCAGGATCCACTGCAAGGAA |
| hSOD2 RTR | 598-617 | CGTGCTCCCACACATCAATC |
| **CHCHD4**  **(NM_001098502)** | hCHCHD4 RTF | 136-155 | CCCAACGATCCATACGAGGA |
| hCHCHD4 RTR | 251-270 | CCTTGATCTCCTCCGTGCTA |
| **hActb**  **(NM_001101)** | hActin RTF | 419-438 | CGCGAGAAGATGACCCAGAT |
| hActin RTR | 468-489 | ACAGCCTGGATAGCAACGTACA |
|  | | | |

| **Table S5.** Data collection and structural refinement statistics of the E336K∆101 variant | |
| --- | --- |
| **Crystallization conditions** | 18 % PEG 4K, 0.2 M Li2SO4, and 0.1 M Tris-HCl, pH 8.5 |
| **Data collection statistics** |  |
| **Space group** | P1211 |
| **Unit cell parameters** |  |
| **a, Å** | 50.28 |
| **b, Å** | 89.10 |
| **c, Å** | 60.11 |
| **Wavelength, Å** | 0.979260 |
| **Resolution, Å** | 89.10-1.80  (1.90-1.80) |
| **No. of unique reflections** | 47011 (6861) |
| **Redundancy** | 2.9 (2.9) |
| **Completeness, %** | 97.5 ( 96.9) |
| **Mn(I)/sd** | 8.4 (2.6) |
| **Rmergea** | 0.075 ( 0.534) |
| **Refinement statistics** |  |
| **Resolution range, Å** | 50.16-1.80 |
| **Protein non-hydrogen atoms** | 3649 |
| **Ligand non-hydrogen atoms** | 59 |
| **Solvent non-hydrogen atoms** | 239 |
| **Rwork (%)** | 16.8 |
| **Rfreeb (%)** | 20.3 |
| **rmsd bond lenght, Å** | 0.008 |
| **rmsd bond angles, °** | 1.796 |
| **Average B-factor, Å2** | 27.24 |
| Values in parentheses correspond to the highest resolution shell.  aRsym = Σ| I - Iav |/ Σ I, where the summation is over symmetry equivalent reflections.  bR calculated for 5% of data excluded from the refinement. | |

**References**

1 Bano D, Prehn JHM (2018) Apoptosis-Inducing Factor (AIF) in Physiology and Disease: The Tale of a Repented Natural Born Killer. EBioMedicine 30: 29-37

2 Berger I, Ben-Neriah Z, Dor-Wolman T, Shaag A, Saada A, Zenvirt S, Raas-Rothschild A, Nadjari M, Kaestner KH, Elpeleg O (2011) Early prenatal ventriculomegaly due to an AIFM1 mutation identified by linkage analysis and whole exome sequencing. Mol Genet Metab 104: 517-520 Doi 10.1016/j.ymgme.2011.09.020

3 Diodato D, Tasca G, Verrigni D, D'Amico A, Rizza T, Tozzi G, Martinelli D, Verardo M, Invernizzi F, Nasca Aet al (2016) A novel AIFM1 mutation expands the phenotype to an infantile motor neuron disease. Eur J Hum Genet 24: 463-466 Doi 10.1038/ejhg.2015.141

4 Edgerley K, Barnicoat A, Offiah AC, Calder AD, Mankad K, Thomas NS, Bunyan DJ, Williams M, Buxton C, Majumdar Aet al (2021) AIFM1-associated X-linked spondylometaphyseal dysplasia with cerebral hypomyelination. Am J Med Genet A 185: 1228-1235 Doi 10.1002/ajmg.a.62072

5 Elrharchi S, Riahi Z, Salime S, Charoute H, Elkhattabi L, Boulouiz R, Kabine M, Bonnet C, Petit C, Barakat A (2020) Novel Mutation in AIFM1 Gene Associated with X-Linked Deafness in a Moroccan Family. Hum Hered. © 2021 S. Karger AG, Basel., City, pp 35-39

6 Ghezzi D, Sevrioukova I, Invernizzi F, Lamperti C, Mora M, D'Adamo P, Novara F, Zuffardi O, Uziel G, Zeviani M (2010) Severe X-linked mitochondrial encephalomyopathy associated with a mutation in apoptosis-inducing factor. Am J Hum Genet 86: 639-649

7 Kawarai T, Yamazaki H, Yamakami K, Tsukamoto-Miyashiro A, Kodama M, Rumore R, Caltagirone C, Nishino I, Orlacchio A (2020) A novel AIFM1 missense mutation in a Japanese patient with ataxic sensory neuronopathy and hearing impairment. J Neurol Sci, City, pp 116584

8 Kettwig M, Schubach M, Zimmermann FA, Klinge L, Mayr JA, Biskup S, Sperl W, Gärtner J, Huppke P (2015) From ventriculomegaly to severe muscular atrophy: Expansion of the clinical spectrum related to mutations in AIFM1. Mitochondrion 21C: 12-18 Doi 10.1016/j.mito.2015.01.001

9 Li J, Wu K, Guan J, Wang Q, Wang H (2021) Generation of a human induced pluripotent stem cell line (CPGHi003-A) from an auditory neuropathy patient with AIFM1 p.R422Q mutation. Stem Cell Res. © 2021 The Authors. Published by Elsevier B.V, City, pp 102376

10 Mierzewska H, Rydzanicz M, Biegański T, Kosinska J, Mierzewska-Schmidt M, Ługowska A, Pollak A, Stawiński P, Walczak A, Kędra Aet al (2017) Spondyloepimetaphyseal dysplasia with neurodegeneration associated with AIFM1 mutation - a novel phenotype of the mitochondrial disease. Clin Genet 91: 30-37 Doi 10.1111/cge.12792

11 Miyake N, Wolf NI, Cayami FK, Crawford J, Bley A, Bulas D, Conant A, Bent SJ, Gripp KW, Hahn Aet al (2017) X-linked hypomyelination with spondylometaphyseal dysplasia (H-SMD) associated with mutations in AIFM1. Neurogenetics 18: 185-194

12 Morton SU, Prabhu SP, Lidov HG, Shi J, Anselm I, Brownstein CA, Bainbridge MN, Beggs AH, Vargas SO, Agrawal PB (2017) AIFM1 mutation presenting with fatal encephalomyopathy and mitochondrial disease in an infant. Cold Spring Harb Mol Case Stud 3: a001560 Doi 10.1101/mcs.a001560

13 Moss T, May M, Flanagan-Steet H, Caylor R, Jiang YH, McDonald M, Friez M, McConkie-Rosell A, Steet R (2021) Severe multisystem pathology, metabolic acidosis, mitochondrial dysfunction, and early death associated with an X-linked AIFM1 variant. Cold Spring Harb Mol Case Stud 7:

14 Neubauer BA, Stefanova I, Hübner CA, Neumaier-Probst E, Bohl J, Oppermann HC, Stö H, Hahn A, Stephani U, Kohlschütter Aet al (2006) A new type of leukoencephalopathy with metaphyseal chondrodysplasia maps to Xq25-q27. Neurology, City, pp 587-591

15 Peng Q, Ma K, Wang L, Zhu Y, Zhang Y, Rao C, Luo D, Jiang Z, Lai W, Lu Het al (2022) Case Report: A Novel Intronic Mutation in AIFM1 Associated With Fatal Encephalomyopathy and Mitochondrial Disease in Infant. Front Pediatr 10: 889089

16 Pijuan J, Sevrioukova IF, García-Campos Ó, Hernaez M, Gort L, Gómez-Chiari M, Jou C, Candela-Cantó S, Rumiá J, Artuch Ret al (2024) A Novel AIFM1-Related Disorder Phenotype Treated with Deep Brain Stimulation. Mov Disord 39: 215-217 Doi 10.1002/mds.29616

17 Pronicka E, Piekutowska-Abramczuk D, Ciara E, Trubicka J, Rokicki D, Karkucińska-Więckowska A, Pajdowska M, Jurkiewicz E, Halat P, Kosińska Jet al (2016) New perspective in diagnostics of mitochondrial disorders: two years' experience with whole-exome sequencing at a national paediatric centre. J Transl Med 14: 174 Doi 10.1186/s12967-016-0930-9

18 Qiu Y, Wang H, Fan M, Pan H, Guan J, Jiang Y, Jia Z, Wu K, Zhou H, Zhuang Qet al (2023) Impaired AIF-CHCHD4 interaction and mitochondrial calcium overload contribute to auditory neuropathy spectrum disorder in patient-iPSC-derived neurons with AIFM1 variant. Cell Death Dis 14: 375

19 Qiu Y, Wang H, Pan H, Ding X, Guan J, Zhuang Q, Wu K, Lei Z, Cai H, Dong Yet al (2024) NADH improves AIF dimerization and inhibits apoptosis in iPSCs-derived neurons from patients with auditory neuropathy spectrum disorder. Hear Res. © 2023 Elsevier B.V, City, pp 108919

20 Qiu Y, Wang H, Pan H, Guan J, Yan L, Fan M, Zhou H, Zhou X, Wu K, Jia Zet al (2023) AIFM1 variants associated with auditory neuropathy spectrum disorder cause apoptosis due to impaired apoptosis-inducing factor dimerization. J Zhejiang Univ Sci B 24: 172-184

21 Sevrioukova IF (2016) Structure/Function Relations in AIFM1 Variants Associated with Neurodegenerative Disorders. J Mol Biol 428: 3650-3665 Doi 10.1016/j.jmb.2016.05.004

22 Villanueva R, Romero-Tamayo S, Laplaza R, Martínez-Olivan J, Velázquez-Campoy A, Sancho J, Ferreira P, Medina M (2019) Redox- and Ligand Binding-Dependent Conformational Ensembles in the Human Apoptosis-Inducing Factor Regulate Its Pro-Life and Cell Death Functions. Antioxid Redox Signal 30: 2013-2029 Doi 10.1089/ars.2018.7658

23 Wang H, Bing D, Li J, Xie L, Xiong F, Lan L, Wang D, Guan J, Wang Q (2020) High Frequency of AIFM1 Variants and Phenotype Progression of Auditory Neuropathy in a Chinese Population. Neural Plast 2020: 5625768

24 Zong L, Guan J, Ealy M, Zhang Q, Wang D, Wang H, Zhao Y, Shen Z, Campbell CA, Wang Fet al (2015) Mutations in apoptosis-inducing factor cause X-linked recessive auditory neuropathy spectrum disorder. J Med Genet 52: 523-531 Doi 10.1136/jmedgenet-2014-102961

25 Zong L, Zhao J, Wu W, Wang J, Huang D, Liu M (2020) AIF knockdown induce apoptosis and mitochondrial dysfunction in cochlear spiral ganglion neurons in vitro. Mol Med Rep 21: 1910-1920 Doi 10.3892/mmr.2020.10970
